# Supplementary material for: Magnetic Nanoclusters Stabilized with Poly[3,4-Dihydroxybenzhydrazide] as Efficient Therapeutic Agents for Cancer Cells Destruction
Source: Nanomaterials (Basel). 2023 Mar 3;13(5):933. doi: 10.3390/nano13050933 (PMC10005337; doi:10.3390/nano13050933)
Supplement: Supplementary file 1 [file nanomaterials-13-00933-s001.zip › nanomaterials-2255857-supplementary.pdf]

# Supplementary Materials

## Magnetic nanoclusters stabilized with poly[3,4-dihydroxybenzhydrazide] as efficient therapeutic agents for cancer cells destruction

Ioana Baldea<sup>1</sup>, Anca Petran<sup>\*2</sup>, Adrian Florea<sup>3</sup>, Alexandra Sevastre-Berghian<sup>1</sup>, Iuliana Nenu<sup>1</sup>, Adriana Filip<sup>1</sup>, Mihai Cenariu<sup>4</sup>, Maria Teodora Radu<sup>2</sup>, Cristian Iacovita<sup>5</sup>

<sup>1</sup> Department of Physiology, Iuliu Hatieganu University of Medicine and Pharmacy, Clinicilor 1-3, 400012 Cluj-Napoca, Romania

<sup>2</sup> National Institute for Research and Development of Isotopic and Molecular Technologies, 67-103 Donat Str., 400293 Cluj-Napoca, Romania

<sup>3</sup> Department of Cell and Molecular Biology, Faculty of Medicine, "Iuliu Hațieganu" University of Medicine and Pharmacy, Pasteur 6, 400349 Cluj-Napoca, Romania

<sup>4</sup> Department of Biochemistry, University of Agricultural Sciences and Veterinary Medicine, Calea Manastur 3-5, 400658, Cluj-Napoca, Romania

<sup>5</sup> Department of Pharmaceutical Physics-Biophysics, Faculty of Pharmacy, "Iuliu Hatieganu" University of Medicine and Pharmacy, 6 Pasteur St., 400349 Cluj-Napoca, Romania

\* Correspondence: [anca.petran@itim-cj.ro](mailto:anca.petran@itim-cj.ro) ; Tel: 0040-753-462-246 (A.P.)

### 1. XPS determination:

**Table S1:** N1s binding energies and surface chemical states identified from XPS measurements.

|                  | N1s      | Chemical state       | at. % |
|------------------|----------|----------------------|-------|
|                  | 399.4 eV | N-C, NH <sub>2</sub> | 53.4% |
| <b>DHBH@MNC</b>  | 400 eV   | N-(C=O)-             | 35%   |
|                  | 401.8 eV | NH <sup>3+</sup>     | 11.5% |
| <b>PDHBH@MNC</b> | 398.6 eV | N-C, NH <sub>2</sub> | 41.8% |
|                  | 399.6 eV | N-(C=O)-             | 58.2% |

### 2. Heating curves of MNC internalized in cells:

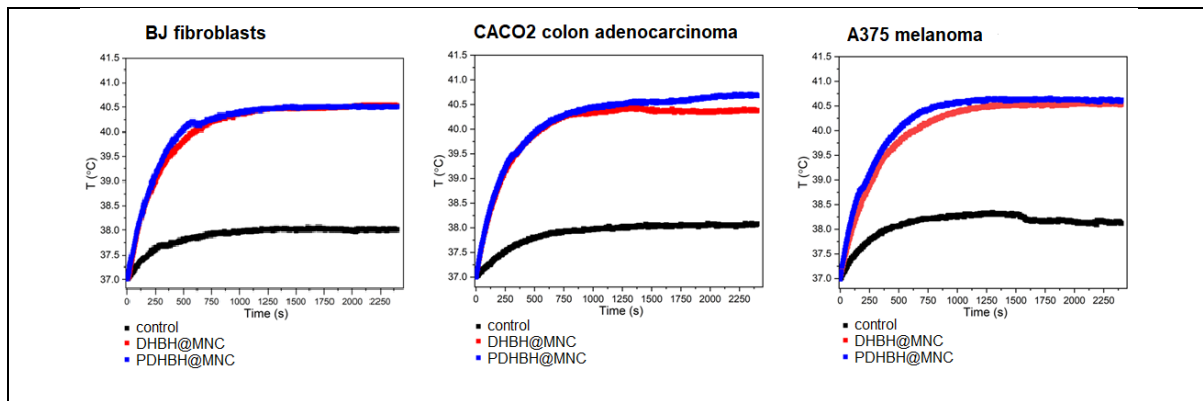

Figure S1. Typical heating curves of cells without and with internalized MNC exposed to an AMF (40 kA/m; 355 kHz) for 40 minutes.

### 3. Flowcytometric assessment:

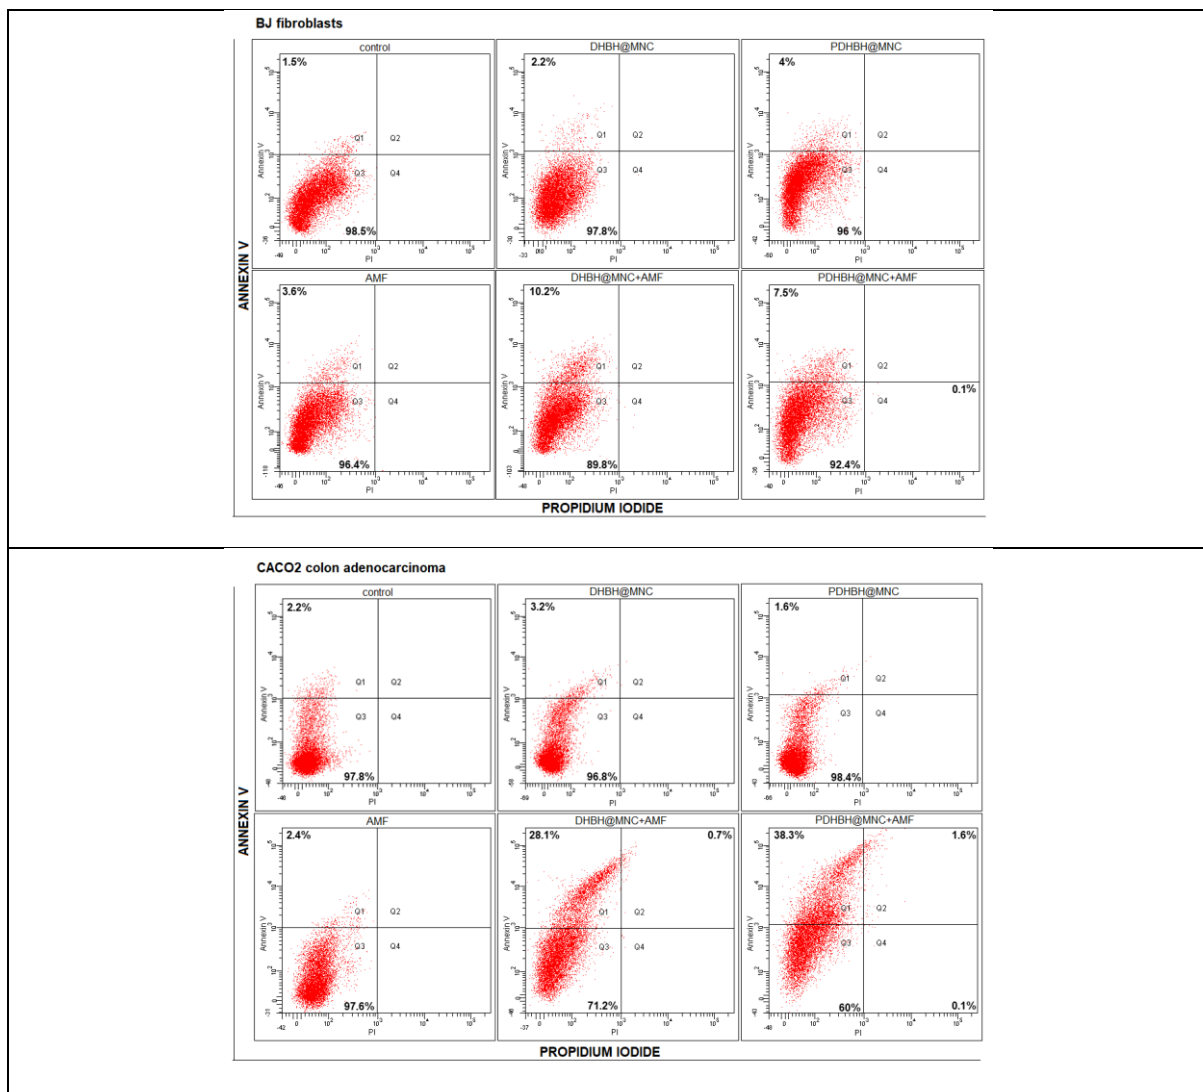

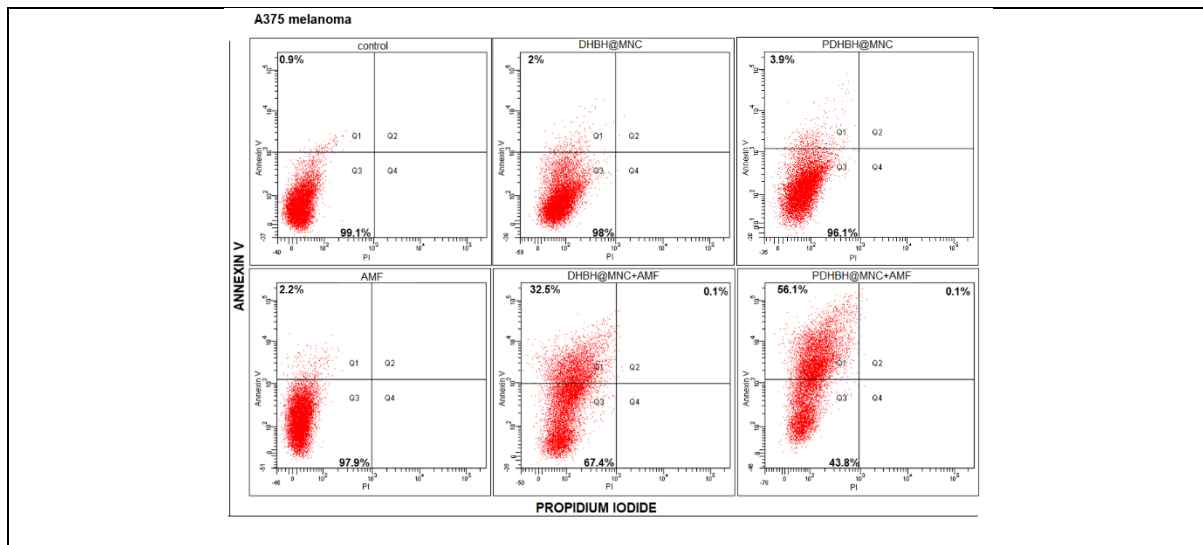

Figure S2. Flowcytometric assessment of the cell death induction by MH exposure: (a) fibroblasts (BJ), (b)-CACO2 and (c) A375 cells . Comparative FACS analysis, quantitative FACS results are expressed as % of total cells counted – viable cells Annexin V (-)/ PI (-) – Q3, early apoptotic cells Annexin V(+) – Q1, necrotic cells PI (+) – Q4, late apoptosis Annexin V (+)/PI (+) – Q2 quadrant, a minimum of 10000 events were quantified for each lot
